# Supplementary material
Source: Elsevier journal article supplement (https://www.sciencedirect.com/science/article/pii/S0300893226000382)
Supplement: mmc1 [file mmc1.pdf]

## SUPPLEMENTARY DATA

| Table S1. Diagnostic codes used to define inclusion criteria |                                                                         |
|--------------------------------------------------------------|-------------------------------------------------------------------------|
| I20.0                                                        | Unstable angina                                                         |
| I20.1                                                        | Angina pectoris with documented spasm                                   |
| I20.8                                                        | Other forms of angina pectoris                                          |
| I20.9                                                        | Angina pectoris, unspecified                                            |
| I21.0                                                        | Acute transmural myocardial infarction of anterior wall                 |
| I21.1                                                        | Acute transmural myocardial infarction of inferior wall                 |
| I21.2                                                        | Acute transmural myocardial infarction of other sites                   |
| I21.3                                                        | Acute transmural myocardial infarction of unspecified site              |
| I21.4                                                        | Acute subendocardial myocardial infarction                              |
| I21.9                                                        | Acute myocardial infarction, unspecified                                |
| I22.0                                                        | Subsequent myocardial infarction of anterior wall                       |
| I22.1                                                        | Subsequent myocardial infarction of inferior wall                       |
| I22.8                                                        | Subsequent myocardial infarction of other sites                         |
| I22.9                                                        | Subsequent myocardial infarction of unspecified site                    |
| I24.0                                                        | Coronary thrombosis not resulting in myocardial infarction              |
| I24.8                                                        | Other forms of acute ischaemic heart disease                            |
| I24.9                                                        | Acute ischaemic heart disease, unspecified                              |
| I25.4                                                        | Coronary artery aneurysm and dissection                                 |
| I21.00                                                       | Anterior NSTEMI                                                         |
| I21.01                                                       | Anterior STEMI                                                          |
| I21.09                                                       | Anterior MI                                                             |
| I21.10                                                       | Inferior NSTEMI                                                         |
| I21.11                                                       | Inferior STEMI                                                          |
| I21.19                                                       | Inferior MI                                                             |
| I21.20                                                       | Other sites NSTEMI                                                      |
| I21.21                                                       | Other sites STEMI                                                       |
| I21.29                                                       | Other sites MI                                                          |
| I21.30                                                       | Acute transmural myocardial infarction of unspecified site NSTEMI       |
| I21.31                                                       | Acute transmural myocardial infarction of unspecified site STEMI        |
| I21.39                                                       | Acute transmural myocardial infarction of unspecified site no statement |
| 410                                                          | Acute myocardial infarction                                             |
| 410.0, 410.0x                                                | Acute myocardial infarction of anterolateral wall                       |
| 410.1, 410.1x                                                | Acute myocardial infarction of other anterior wall                      |
| 410.2, 410.2x                                                | Acute myocardial infarction of inferolateral wall                       |
| 410.3, 410.3x                                                | Acute myocardial infarction of inferoposterior wall                     |
| 410.4, 410.4x                                                | Acute myocardial infarction of other inferior wall                      |
| 410.5, 410.5x                                                | Acute myocardial infarction of other lateral wall                       |
| 410.6, 410.6x                                                | True posterior wall infarction                                          |
| 410.7, 410.7x                                                | Subendocardial infarction                                               |
| 410.8, 410.8x                                                | Acute myocardial infarction of other specified sites                    |

|               |                                                           |
|---------------|-----------------------------------------------------------|
| 410.9, 410.9x | Acute myocardial infarction of unspecified site           |
| 411           | Other acute and subacute forms of ischemic heart disease  |
| 411.0         | Postmyocardial infarction syndrome                        |
| 411.1         | Intermediate coronary syndrome                            |
| 411.8, 411.8x | Other acute and subacute forms of ischemic heart disease  |
| 412           | Other acute and subacute forms of ischemic heart disease  |
| 413           | Angina pectoris                                           |
| 413.0         | Angina decubitus                                          |
| 413.1         | Prinzmetal angina                                         |
| 413.9         | Other and unspecified angina pectoris                     |
| 414           | Other forms of chronic ischemic heart disease             |
| 414.0, 414.0x | Coronary atherosclerosis                                  |
| 414.1, 414.1x | Aneurysm and dissection of heart                          |
| 414.2         | Chronic total occlusion of coronary artery                |
| 414.3         | Coronary atherosclerosis due to lipid rich plaque         |
| 414.4         | Coronary atherosclerosis due to calcified coronary lesion |
| 414.8         | Other specified forms of chronic ischemic heart disease   |
| 414.9         | Chronic ischemic heart disease, unspecified               |
| 996.03        | Mechanical complication due to coronary bypass graft      |
| V45.81        | Aortocoronary bypass status                               |
| V45.82        | Percutaneous transluminal coronary angioplasty status     |

| Table S2. Diagnostic codes used to define incident heart failure |                                                                                                                                                            |
|------------------------------------------------------------------|------------------------------------------------------------------------------------------------------------------------------------------------------------|
| 398.91                                                           | Rheumatic heart failure (congestive)                                                                                                                       |
| 402.01                                                           | Malignant hypertensive heart disease with heart failure                                                                                                    |
| 402.11                                                           | Benign hypertensive heart disease with heart failure                                                                                                       |
| 402.91                                                           | Unspecified hypertensive heart disease with heart failure                                                                                                  |
| 404.01                                                           | Hypertensive heart and chronic kidney disease, malignant, with heart failure and with chronic kidney disease stage I through stage IV, or unspecified      |
| 404.03                                                           | Hypertensive heart and chronic kidney disease, malignant, with heart failure and with chronic kidney disease stage V or end stage renal disease            |
| 404.11                                                           | Hypertensive heart and chronic kidney disease, benign, with heart failure and with chronic kidney disease stage I through stage IV, or unspecified         |
| 404.13                                                           | Hypertensive heart and chronic kidney disease, benign, with heart failure and chronic kidney disease stage V or end stage renal disease                    |
| 404.91                                                           | Hypertensive heart and chronic kidney disease, unspecified, with heart failure and with chronic kidney disease stage I through stage IV, or unspecified    |
| 404.93                                                           | Hypertensive heart and chronic kidney disease, unspecified, with heart failure and chronic kidney disease stage V or end stage renal disease               |
| 428.xx                                                           | Heart failure                                                                                                                                              |
| 4280                                                             | Congestive heart failure, unspecified                                                                                                                      |
| 4280                                                             | Congestive heart failure, unspecified                                                                                                                      |
| 4281                                                             | Left heart failure                                                                                                                                         |
| 42820                                                            | Systolic heart failure, unspecified                                                                                                                        |
| 42821                                                            | Acute systolic heart failure                                                                                                                               |
| 42822                                                            | Chronic systolic heart failure                                                                                                                             |
| 42823                                                            | Acute on chronic systolic heart failure                                                                                                                    |
| 42830                                                            | Diastolic heart failure, unspecified                                                                                                                       |
| 42831                                                            | Acute diastolic heart failure                                                                                                                              |
| 42832                                                            | Chronic diastolic heart failure                                                                                                                            |
| 42833                                                            | Acute on chronic diastolic heart failure                                                                                                                   |
| 42840                                                            | Combined systolic and diastolic heart failure, unspecified                                                                                                 |
| 42841                                                            | Acute combined systolic and diastolic heart failure                                                                                                        |
| 42842                                                            | Chronic combined systolic and diastolic heart failure                                                                                                      |
| 42843                                                            | Acute on chronic combined systolic and diastolic heart failure                                                                                             |
| 4289                                                             | Heart failure, unspecified                                                                                                                                 |
| I0981                                                            | Rheumatic heart failure                                                                                                                                    |
| I110                                                             | Hypertensive heart disease with heart failure                                                                                                              |
| I130                                                             | Hypertensive heart and chronic kidney disease with heart failure and stage 1 through stage 4 chronic kidney disease, or unspecified chronic kidney disease |
| I132                                                             | Hypertensive heart and chronic kidney disease with heart failure and with stage 5 chronic kidney disease, or end stage renal disease                       |
| I501                                                             | Left ventricular failure, unspecified                                                                                                                      |
| I5020                                                            | Unspecified systolic (congestive) heart failure                                                                                                            |

|        |                                                                                          |
|--------|------------------------------------------------------------------------------------------|
| I5021  | Acute systolic (congestive) heart failure                                                |
| I5022  | Chronic systolic (congestive) heart failure                                              |
| I5023  | Acute on chronic systolic (congestive) heart failure                                     |
| I5030  | Unspecified diastolic (congestive) heart failure                                         |
| I5031  | Acute diastolic (congestive) heart failure                                               |
| I5032  | Chronic diastolic (congestive) heart failure                                             |
| I5033  | Acute on chronic diastolic (congestive) heart failure                                    |
| I5040  | Unspecified combined systolic (congestive) and diastolic (congestive) heart failure      |
| I5041  | Acute combined systolic (congestive) and diastolic (congestive) heart failure            |
| I5042  | Chronic combined systolic (congestive) and diastolic (congestive) heart failure          |
| I5043  | Acute on chronic combined systolic (congestive) and diastolic (congestive) heart failure |
| I50810 | Right heart failure, unspecified                                                         |
| I50811 | Acute right heart failure                                                                |
| I50812 | Chronic right heart failure                                                              |
| I50813 | Acute on chronic right heart failure                                                     |
| I50814 | Right heart failure due to left heart failure                                            |
| I5082  | Biventricular heart failure                                                              |
| I5083  | High output heart failure                                                                |
| I5084  | End stage heart failure                                                                  |
| I5089  | Other heart failure                                                                      |
| I509   | Heart failure, unspecified                                                               |
| I97130 | Postprocedural heart failure following cardiac surgery                                   |
| I97131 | Postprocedural heart failure following other surgery                                     |
| O29121 | Cardiac failure due to anaesthesia during pregnancy, first trimester                     |
| O29122 | Cardiac failure due to anaesthesia during pregnancy, second trimester                    |
| O29123 | Cardiac failure due to anaesthesia during pregnancy, third trimester                     |
| O29129 | Cardiac failure due to anaesthesia during pregnancy, unspecified trimester               |
| Z95811 | Presence of heart assist device                                                          |
| Z95812 | Presence of fully implantable artificial heart                                           |

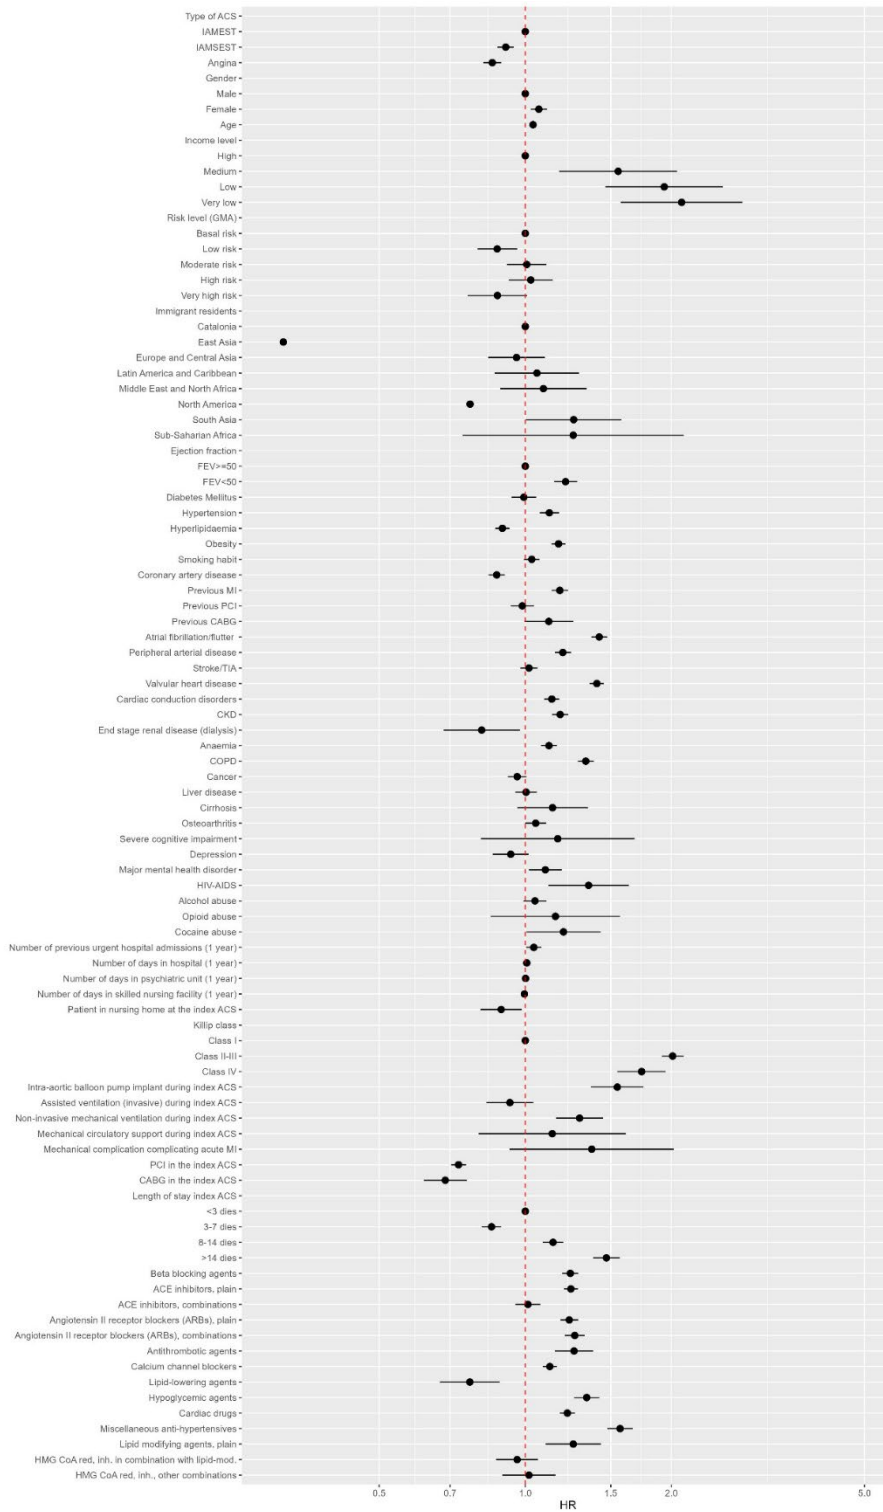

**Figure S1.** Forest plot of the multivariate Fine and Gray regression analysis evaluating the predictors of incident heart failure after acute coronary syndrome. Competing risk between death and incident HF were considered in these analyses. HR, hazard ratio; NSTEMI, non-ST-elevation myocardial infarction; STEMI, ST-elevation myocardial infarction.

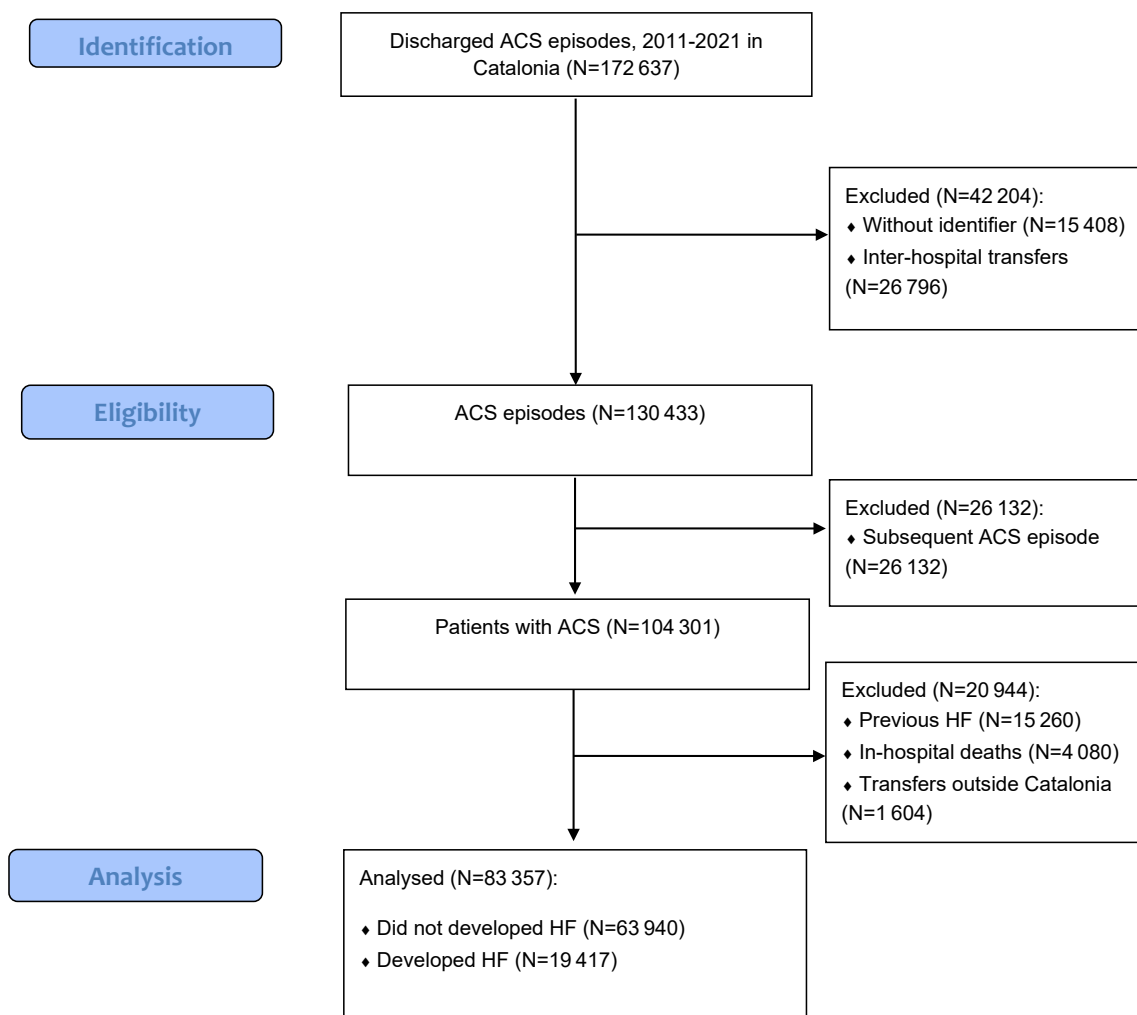

**Figure S2.** Flow chart of patient selection. ACS, acute coronary syndromes; HF, heart failure; MI, myocardial infarction.

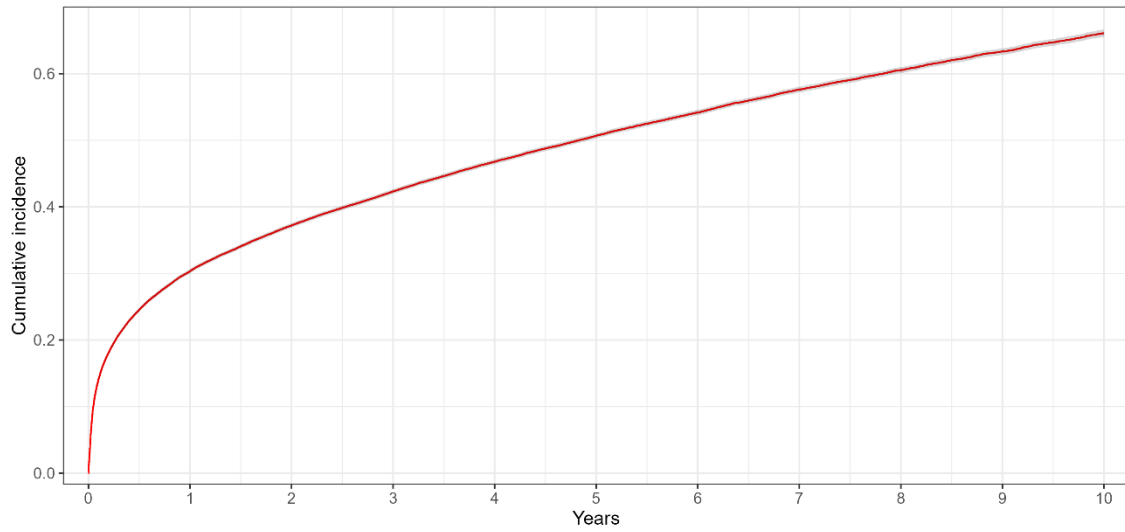

**Figure S3.** Kaplan-Meier incidence of a 5-point MACE in the whole cohort. MACEm major adverse cardiovascular event (5-point: all-cause death, recurrent ACS, new coronary revascularisation [either surgical or percutaneous], stroke, and incident heart failure).
